# Supplementary material for: Risk of complicated birth at term in nulliparous and multiparous women using routinely collected maternity data in England: cohort study
Source: PubMed Central journal article supplement — BMJ. 2020 Oct 1;371:m3377. doi: 10.1136/bmj.m3377 (PMC7527835; doi:10.1136/bmj.m3377), 2020-10-01
Supplement: jarj056744.ww.pdf [file jarj056744.ww.pdf]

## **Risk of complicated birth at term in nulliparous and multiparous women using routinely collected maternity data in England: a cohort study**

### **SUPPORTING INFORMATION TABLES**

#### **List of Tables**

Table S1: Coding structures used to identify women at increased, intermediate and low risk according to NICE intrapartum care guideline

Table S2: Components of composite outcome by risk sub-group, parity and obstetric history in 41 001 women who gave birth at term following a trial of labour, and were intermediate risk at the onset of labour (\*elective caesarean births excluded)

Table S3: Risk ratios for complicated birth in 276 766 women who gave birth at term following a trial of labour (\*elective caesarean births excluded)

Table S4. Components of composite outcome without instrumental delivery by risk group, parity and obstetric history in 276 766 women who gave birth at term following a trial of labour (\*elective caesarean births excluded)

Table S5: Characteristics of included and excluded NHS hospital trusts, and women who gave birth to a singleton infant at term within those trusts

| Table S1: Coding structures used to identify women at increased, intermediate and low risk according to NICE intrapartum care guideline |                                                                                                 |             |        |                |
|-----------------------------------------------------------------------------------------------------------------------------------------|-------------------------------------------------------------------------------------------------|-------------|--------|----------------|
| Factor                                                                                                                                  | ICD – 10 code                                                                                   | Frequencies |        | Classified as  |
|                                                                                                                                         |                                                                                                 | n           | %      |                |
| <b>Medical conditions indicating increased risk suggesting planned birth at an obstetric unit</b>                                       |                                                                                                 |             |        |                |
| Confirmed cardiac disease                                                                                                               | I01<br>I05-09<br>I20-28<br>I30-152<br>I97-98                                                    | 2852        | 0.80%  | Increased risk |
| Hypertensive disorders                                                                                                                  | O10-O11<br>I10-116                                                                              | 2031        | 0.06%  | Increased risk |
| Asthma requiring an increase in treatment or hospital treatment                                                                         | J45 - not possible to restrict by treatment                                                     | 37314       | 10.47% | Low risk       |
| Cystic fibrosis                                                                                                                         | E84                                                                                             | 36          | 0.01%  | Increased risk |
| Haemoglobinopathies – sickle-cell disease, beta-thalassaemia major                                                                      | D570, D571, D572, D578, D561                                                                    | 467         | 0.13%  | Increased risk |
| History of thromboembolic disorders                                                                                                     | I74-I76, I63, I26, O88, I80-I82                                                                 | 843         | 0.24%  | Increased risk |
| Immune thrombocytopenia purpura or other platelet disorder or platelet count below 100×10 <sup>9</sup> /litre                           | D693, D691, D694, D695, D696                                                                    | 1522        | 0.43%  | Increased risk |
| Von Willebrand's disease                                                                                                                | D680                                                                                            | 183         | 0.05%  | Increased risk |
| Bleeding disorder in the woman                                                                                                          | D68, D65, D66, D67, D699                                                                        | 1811        | 0.51%  | Increased risk |
| Bleeding disorder in the unborn baby                                                                                                    | Not possible                                                                                    |             |        | Not included   |
| Atypical antibodies which carry a risk of haemolytic disease of the newborn                                                             | P55, P56; O361; O360                                                                            | 1511        | 0.42%  | Increased risk |
| Hyperthyroidism                                                                                                                         | E05                                                                                             | 838         | 0.24%  | Increased risk |
| Diabetes                                                                                                                                | E10-E14, O24                                                                                    | 2859        | 0.80%  | Increased risk |
| Hepatitis B/C with abnormal liver function tests                                                                                        | B180, B181, B16, B171, B182 (+ R945)                                                            | 680         | 0.19%  | Increased risk |
| Carrier of/infected with HIV                                                                                                            | B20-B24 ; Z21 ; O987                                                                            | <5          | <0.01% | Increased risk |
| Toxoplasmosis – women receiving treatment                                                                                               | B58                                                                                             | 9           | 0.00%  | Increased risk |
| Current active infection of chicken pox/rubella/genital herpes in the woman or baby                                                     | B01; B06; A60                                                                                   | 13          | 0.00%  | Increased risk |
| Tuberculosis under treatment                                                                                                            | A15,A17,A18,A19                                                                                 | 12          | 0.00%  | Increased risk |
| Systemic lupus erythematosus                                                                                                            | M32                                                                                             | 293         | 0.08%  | Increased risk |
| Scleroderma                                                                                                                             | M34; L940                                                                                       | 30          | 0.01%  | Increased risk |
| Abnormal renal function or renal disease requiring supervision by a renal specialist                                                    | N17-N19; P96; D594; K767; R392<br>E87 (most commonly renal)<br>I12, I13, N00-N19; N25; N28; N29 | 2811        | 0.79%  | Increased risk |
| Epilepsy                                                                                                                                | G40                                                                                             | 2859        | 0.80%  | Increased risk |
| Myasthenia gravis                                                                                                                       | G70                                                                                             | 44          | 0.01%  | Increased risk |
| Previous cerebrovascular accident                                                                                                       | I60-I66 through lookback                                                                        | 102         | 0.03%  | Increased risk |
| Liver disease associated with current abnormal liver function tests                                                                     | K70-K77 (+ R945 OR R748)                                                                        | 225         | 0.06%  | Increased risk |
| Psychiatric disorder requiring current inpatient care [inclusive approach as under outpatient care also included]                       | F20-31, F322, F323, F332, F333, F42, F431, F500, F502, F503, F60,                               | 14517       | 4.07%  | Increased risk |
| <b>Other factors indicating increased risk suggesting planned birth at an obstetric unit: (1) Previous complications</b>                |                                                                                                 |             |        |                |
| Unexplained stillbirth/neonatal death or previous death related to intrapartum difficulty                                               | Previous stillbirth using look back approach; Z352                                              | 3604        | 1.01%  | Increased risk |
| Previous baby with neonatal encephalopathy                                                                                              | Not possible                                                                                    |             |        |                |

|                                                                                                                     |                                                                                                                      |                      |        |                |
|---------------------------------------------------------------------------------------------------------------------|----------------------------------------------------------------------------------------------------------------------|----------------------|--------|----------------|
| Pre-eclampsia requiring preterm birth                                                                               | Previous pre-term and pre-eclampsia using combination of codes in lookback approach O13, O14                         | 17799                | 5.00%  | Increased risk |
| Placental abruption with adverse outcome                                                                            | O45 ; not possible to define adverse outcome                                                                         | 1022                 | 0.29%  | Increased risk |
| Eclampsia                                                                                                           | O15                                                                                                                  | 220                  | 0.06%  | Increased risk |
| Uterine rupture                                                                                                     | O710 O711                                                                                                            | 146                  | 0.04%  | Increased risk |
| Primary postpartum haemorrhage requiring additional treatment or blood transfusion                                  | O72, X33 (OPCS)                                                                                                      | 44896                | 12.60% | Increased risk |
| Retained placenta requiring manual removal in theatre                                                               | O73                                                                                                                  | 2986                 | 0.84%  | Increased risk |
| Caesarean section                                                                                                   | Indication of previous caesarean section in either MIS or HES lookback                                               | 45104                | 12.66% | Increased risk |
| Shoulder dystocia                                                                                                   | O660                                                                                                                 | 2908                 | 0.82%  | Increased risk |
| <b>Other factors indicating increased risk suggesting planned birth at an obstetric unit: (2) Current pregnancy</b> |                                                                                                                      |                      |        |                |
| Multiple birth                                                                                                      | O30, numberinfant>1                                                                                                  | excluded from cohort |        | Increased risk |
| Placenta praevia                                                                                                    | O44                                                                                                                  | 2138                 | 0.60%  | Increased risk |
| Pre-eclampsia or pregnancy-induced hypertension                                                                     | O10-O16                                                                                                              | 23022                | 6.46%  | Increased risk |
| Preterm labour or preterm prelabour rupture of membranes                                                            | Gestational age not term, O60, O42                                                                                   | 21198                | 5.95%  | Increased risk |
| Placental abruption                                                                                                 | O45                                                                                                                  | 1410                 | 0.40%  | Increased risk |
| Anaemia – haemoglobin less than 85 g/litre at onset of labour                                                       | Not possible                                                                                                         |                      | 0.00%  | Low risk       |
| Confirmed intrauterine death                                                                                        | from maternity information system data                                                                               | 1271                 | 0.36%  | Increased risk |
| Substance misuse or alcohol misuse                                                                                  | F10-16; F18-19; Z86.4;                                                                                               | 1322                 | 0.37%  | Increased risk |
| Gestational diabetes                                                                                                | O244; O249                                                                                                           | 17210                | 4.83%  | Increased risk |
| Malpresentation – breech or transverse lie                                                                          | Uses fetal presentation recorded in maternity information system and in delivery method; assumes cephalic if missing | 27606                | 7.75%  | Increased risk |
| BMI at booking >35                                                                                                  | Uses BMI recorded in maternity information system                                                                    | 39330                | 11.04% | Increased risk |
| Recurrent APH                                                                                                       | O46 (note this is any APH)                                                                                           | 39324                | 11.04% | Increased risk |
| Small for gestational age in this pregnancy (less than 5 <sup>th</sup> centile, or reduced growth velocity on US)   | O365                                                                                                                 | 5337                 | 1.50%  | Increased risk |
| Abnormal FHR/Doppler studies                                                                                        | O363, O365                                                                                                           | 16759                | 4.70%  | Increased risk |
| Ultrasound diagnosis of oligo- or polyhydramnios                                                                    | O40, O41                                                                                                             | 11090                | 3.11%  | Increased risk |
| Previous myomectomy                                                                                                 | O342 [previous]                                                                                                      | 13118                | 3.68%  | Increased risk |
| Previous hysterotomy                                                                                                | Not able to be identified separately from previous caesarean section                                                 |                      |        | Increased risk |
| <b>Medical conditions indicating individual assessment when planning place of birth</b>                             |                                                                                                                      |                      |        |                |
| Cardiac disease without intrapartum implications                                                                    | I20-I52 *note no severity available                                                                                  | 2852                 | 0.80%  | Increased risk |

|                                                                                                                |                                                                                                                                  |       |        |                   |
|----------------------------------------------------------------------------------------------------------------|----------------------------------------------------------------------------------------------------------------------------------|-------|--------|-------------------|
| Atypical antibodies not putting the baby at risk of haemolytic disease                                         | As previous                                                                                                                      | 1511  | 0.42%  | Increased risk    |
| Sickle-cell trait                                                                                              | D573                                                                                                                             | 1973  | 0.55%  | Increased risk    |
| Thalassaemia trait                                                                                             | D563, D569                                                                                                                       | 1703  | 0.48%  | Increased risk    |
| Anaemia – haemoglobin 85–105 g/litre at onset of labour                                                        | O990 but not able to differentiate whether ante- or postpartum                                                                   | 642   | 0.18%  | Low risk          |
| Hepatitis B/C with normal liver function tests                                                                 | B180, B181, B16, B171, B182 (not able to differentiate)                                                                          | 680   | 0.19%  | Increased risk    |
| Non-specific connective tissue disorders                                                                       | M30-M31, M33-M36                                                                                                                 | 1099  | 0.31%  | Increased risk    |
| Unstable hypothyroidism such that a change in treatment is required                                            | E018, E03, E063 - not possible to differentiate treatment                                                                        | 6683  | 1.88%  | Low risk          |
| Spinal abnormalities                                                                                           | M40-M43                                                                                                                          | 1709  | 0.48%  | Increased risk    |
| Previous fractured pelvis                                                                                      | Previous S32                                                                                                                     | 193   | 0.05%  |                   |
| Neurological deficits                                                                                          | G13-G99                                                                                                                          | 10425 | 2.93%  | Increased risk    |
| Liver disease without current abnormal liver function                                                          | K70-K77                                                                                                                          | 225   | 0.06%  | Increased risk    |
| Crohn's disease                                                                                                | K50                                                                                                                              | 996   | 0.28%  | Increased risk    |
| Ulcerative colitis                                                                                             | K51                                                                                                                              | 877   | 0.25%  | Increased risk    |
| <b>Other factors indicating individual assessment when planning place of birth (1): previous complications</b> |                                                                                                                                  |       |        |                   |
| Stillbirth/neonatal death with a known non-recurrent cause                                                     | Use prev_sb from lookback                                                                                                        | 3604  | 1.01%  | Increased risk    |
| Pre-eclampsia developing at term                                                                               | O14, O15 + no evidence of preterm delivery previously                                                                            | 17799 | 5.00%  | Increased risk    |
| Placental abruption with good outcome                                                                          | O45 in lookback                                                                                                                  | 1022  | 0.29%  | Increased risk    |
| History of previous baby more than 4.5 kg                                                                      | O366 in previous record                                                                                                          | 5029  | 1.41%  | Low risk          |
| Extensive vaginal, cervical, or third- or fourth-degree perineal trauma                                        | Able to differentiate previous third- or fourth- degree tear only from HES lookback: O702,O703,O704 or procedure code R322, R325 | 5614  | 1.58%  | Increased risk    |
| Previous term baby with jaundice requiring exchange transfusion                                                | Nil                                                                                                                              |       |        | Unable to measure |
| <b>Other factors indicating individual assessment when planning place of birth (1): current pregnancy</b>      |                                                                                                                                  |       |        |                   |
| Antepartum bleeding of unknown origin (single episode after 24 weeks of gestation)                             | O46                                                                                                                              | 39324 | 11.04% | Increased risk    |
| BMI at booking of 30–35 kg/m <sup>2</sup>                                                                      | Use BMI                                                                                                                          | 46422 | 13.03% | Intermediate risk |
| Blood pressure of 140 mmHg systolic or 90 mmHg diastolic or more on 2 occasions                                | Not possible without diagnostic                                                                                                  |       |        | Not possible      |
| Clinical or ultrasound suspicion of macrosomia                                                                 | O366                                                                                                                             | 2061  | 0.58%  | Increased risk    |
| Para 4 or more                                                                                                 | Use parity                                                                                                                       | 13143 | 3.69%  | Intermediate risk |
| Recreational drug use                                                                                          | Unable to distinguish from substance misuse above                                                                                |       |        | Increased risk    |
| Under current outpatient psychiatric care                                                                      | Unable to distinguish from psychiatric conditions above                                                                          |       |        | Increased risk    |
| Age over 35 at booking                                                                                         | Uses age in maternity information system                                                                                         | 62786 | 17.62% | Intermediate risk |
| Fetal abnormality                                                                                              | O35                                                                                                                              | 2464  | 0.69%  | Increased risk    |
| Previous major gynaecological surgery; Previous cone biopsy or large loop excision of the transformation zone  | O342, O346, O348 in lookback or current; previous record of procedures Q238, Q239, Q24, Q01, Q05, Q544, Q555, Q556, Q557         | 7771  | 2.18%  | Increased risk    |
| Previous fibroids                                                                                              | O341 D25 in lookback                                                                                                             | 667   | 0.19%  | Increased risk    |

**Supplementary material Table S2: Components of composite outcome by risk sub-group, parity and obstetric history in 41 001 women who gave birth at term following a trial of labour, and were intermediate risk at the onset of labour (\*elective caesarean births excluded)**

|                                      | Low risk women |        | Intermediate risk |        |           |        | All   |          |       |
|--------------------------------------|----------------|--------|-------------------|--------|-----------|--------|-------|----------|-------|
|                                      | n              | %      | BMI 30.0-34.9     |        | Age 35-44 |        |       | Parity≥4 |       |
|                                      |                |        | n                 | %      | n         | %      |       |          |       |
| <b>Primiparous</b>                   | 61039          |        | 6943              |        | 8656      |        | 16491 |          |       |
| <i>without ELCS</i>                  | 59413          |        | 6671              |        | 8134      |        | 15616 |          |       |
| Spontaneous vaginal delivery         | 36586          | 61.58% | 4065              | 60.94% | 4636      | 57.00% | 9127  |          |       |
| Instrumental birth                   | 15377          | 25.88% | 1391              | 20.85% | 2263      | 27.82% | 3830  |          |       |
| Emergency caesarean birth            | 7445           | 12.53% | 1215              | 18.21% | 1233      | 15.16% | 2657  |          |       |
| Postpartum haemorrhage               | 1561           | 2.56%  | 210               | 3.02%  | 221       | 2.55%  | 468   |          |       |
| Obstetric anal sphincter injury      | 3565           | 6.00%  | 336               | 5.04%  | 388       | 4.77%  | 755   |          |       |
| Apgar score less than 7 at 5 minutes | 696            | 1.14%  | 92                | 1.33%  | 92        | 1.06%  | 194   |          |       |
| Complicated birth                    | 25838          | 43.49% | 2938              | 44.04% | 3806      | 46.79% | 8451  |          |       |
| <b>Multiparous</b>                   | 56513          |        | 8875              |        | 11674     | 2042   | 26056 |          |       |
| <i>without ELCS</i>                  | 55426          |        | 8700              |        | 11284     | 2022   | 25385 |          |       |
| Spontaneous vaginal delivery         | 52302          | 94.36% | 8178              | 94.00% | 10297     | 91.25% | 1954  | 96.64%   | 23530 |
| Instrumental birth                   | 2140           | 3.86%  | 283               | 3.25%  | 650       | 5.76%  | 34    | 1.68%    | 1098  |
| Emergency caesarean birth            | 976            | 1.76%  | 237               | 2.72%  | 334       | 2.96%  | 32    | 1.58%    | 749   |
| Postpartum haemorrhage               | 689            | 1.22%  | 143               | 1.61%  | 191       | 1.64%  | 17    | 0.83%    | 414   |
| Obstetric anal sphincter injury      | 1125           | 2.03%  | 123               | 1.41%  | 306       | 2.71%  | 7     | 0.35%    | 485   |
| Apgar score less than 7 at 5 minutes | 318            | 0.56%  | 52                | 0.59%  | 76        | 0.65%  | 16    | 0.78%    | 185   |
| Complicated birth                    | 4929           | 8.89%  | 771               | 8.86%  | 1449      | 12.84% | 1922  | 95.05%   | 22673 |

Supplementary material Table S3: Risk ratios for complicated birth in 276 766 women who gave birth at term following a trial of labour (\*elective caesarean births excluded).

| NICE risk classification                  | Nulliparous women |                    |      |                       | Multiparous women without previous CS |                    |      |                       | Multiparous women with previous CS |                    |      |                       |
|-------------------------------------------|-------------------|--------------------|------|-----------------------|---------------------------------------|--------------------|------|-----------------------|------------------------------------|--------------------|------|-----------------------|
|                                           | Number in group   | Complicated births | %    | Risk ratio‡ (95% CI)† | Number in group                       | Complicated births | %    | Risk ratio‡ (95% CI)† | Number in group                    | Complicated births | %    | Risk ratio‡ (95% CI)† |
| <b>Low risk</b>                           | 59 413            | 25 805             | 43.4 | 4.89 (4.75 to 5.03)   | 55 426                                | 4 879              | 8.8  | Reference             |                                    |                    |      |                       |
| <b>Intermediate risk</b>                  | 15 616            | 7 153              | 45.8 | 5.16 (5.00 to 5.33)   | 25 385                                | 2 712              | 10.7 | 1.20 (1.15 to 1.26)   |                                    |                    |      |                       |
| BMI 30 to 34 alone                        | 6 671             | 2 933              | 44.0 | 4.95 (4.76 to 5.14)   | 8 700                                 | 771                | 8.9  | 1.00 (0.93 to 1.07)   |                                    |                    |      |                       |
| Age 35+ alone                             | 8 134             | 3 799              | 46.7 | 5.26 (5.08 to 5.45)   | 11 284                                | 1 449              | 12.8 | 1.44 (1.37 to 1.53)   |                                    |                    |      |                       |
| Parity 4+ alone                           | 0                 | 0                  | -    | -                     | 2 022                                 | 100                | 4.9  | 0.56 (0.46 to 0.67)   |                                    |                    |      |                       |
| Multiple risk factors                     | 811               | 421                | 51.9 | 5.84 (5.44 to 6.27)   | 3 379                                 | 392                | 11.6 | 1.35 (1.22 to 1.49)   |                                    |                    |      |                       |
| <b>Increased risk</b>                     | 43 902            | 25 230             | 57.5 | 6.46 (6.28 to 6.64)   | 57 330                                | 9 767              | 17.0 | 1.92 (1.86 to 1.98)   | 19 694                             | 10 908             | 55.4 | 6.23 (6.05 to 6.41)   |
| Previous caesarean section alone          |                   |                    |      |                       |                                       |                    |      |                       | 7 993                              | 3 426              | 42.9 | 4.82 (4.65 to 5.00)   |
| BMI 35+ alone*                            | 7 063             | 3 260              |      | 5.19 (5.00 to 5.38)   | 8 134                                 | 917                | 11.3 | 1.27 (1.19 to 1.35)   | 790                                | 317                | 40.1 | 4.51 (4.13 to 4.93)   |
| Pre-existing medical conditions alone*    | 9 920             | 5 098              | 51.4 | 5.78 (5.59 to 5.97)   | 11 446                                | 1 445              | 12.6 | 1.42 (1.34 to 1.50)   | 1 217                              | 571                | 46.9 | 5.28 (4.94 to 5.63)   |
| Significant obstetric history alone*      |                   |                    |      |                       | 8 415                                 | 1 511              | 18.0 | 2.02 (1.92 to 2.13)   | 1 110                              | 505                | 45.5 | 5.12 (4.77 to 5.48)   |
| Complications in current pregnancy alone* | 19 464            | 12 456             | 64.0 | 7.20 (6.99 to 7.41)   | 13 230                                | 2 826              | 21.4 | 2.40 (2.30 to 2.51)   | 4 601                              | 3 480              | 75.6 | 8.51 (8.24 to 8.78)   |
| Number of risk factor types               |                   |                    |      |                       |                                       |                    |      |                       |                                    |                    |      |                       |
| 1*                                        | 36 447            | 20 814             | 57.1 | 6.42 (6.24 to 6.60)   | 41 225                                | 6 709              | 16.3 | 1.83 (1.77 to 1.89)   | 7 718                              | 4 873              | 63.1 | 7.10 (6.88 to 7.33)   |
| 2*                                        | 6 889             | 4 052              | 58.8 | 6.61 (6.40 to 6.84)   | 13 294                                | 2 445              | 18.4 | 2.07 (1.98 to 2.16)   | 3 147                              | 2 055              | 65.3 | 7.34 (7.08 to 7.62)   |
| 3+*                                       | 566               | 364                | 64.3 | 7.23 (6.76 to 7.73)   | 2 811                                 | 613                | 21.8 | 2.49 (2.31 to 2.68)   | 836                                | 554                | 66.3 | 7.45 (7.05 to 7.87)   |

\* significant obstetric history, not including previous CS  
‡ Risk in low-risk multiparous women was used as the reference category.  
† all p values, except the comparison with multiparous women with BMI 30-34 as the only risk factor (highlighted with a \$), are less than 0.001. \$p=

**Supplementary material Table S4. Components of composite outcome without instrumental delivery by risk group, parity and obstetric history in 276 766 women who gave birth at term following a trial of labour (\*elective caesarean births excluded)**

|                                                                           | Low risk women     |      |                | Intermediate risk  |      |                | Increased risk     |      |                |
|---------------------------------------------------------------------------|--------------------|------|----------------|--------------------|------|----------------|--------------------|------|----------------|
|                                                                           | Women with outcome |      |                | Women with outcome |      |                | Women with outcome |      |                |
|                                                                           | n                  | %    | (95% CI)       | n                  | %    | (95% CI)       | n                  | %    | (95% CI)       |
| <b>Nulliparous with a trial of labour</b>                                 | 59 413             |      |                | 15 616             |      |                | 43 902             |      |                |
| Complicated birth                                                         | 12 492             | 21.0 | (20.7 to 21.4) | 3 808              | 24.4 | (23.7 to 25.1) | 15 013             | 34.2 | (33.8 to 34.6) |
| Emergency caesarean birth                                                 | 7 445              | 12.5 | (12.2 to 12.9) | 2 657              | 17.0 | (16.4 to 17.6) | 11 274             | 25.7 | (25.3 to 26.1) |
| Obstetric anal sphincter injury                                           | 3 565              | 6.0  | (5.8 to 6.2)   | 755                | 4.8  | (4.5 to 5.2)   | 2 266              | 5.2  | (5.0 to 5.4)   |
| Postpartum haemorrhage                                                    | 1 561              | 2.6  | (2.5 to 2.8)   | 468                | 3.0  | (2.7 to 3.3)   | 1 903              | 4.3  | (4.1 to 4.5)   |
| 5-minute Apgar $\leq 7$                                                   | 696                | 1.2  | (1.0 to 1.3)   | 194                | 1.2  | (1.1 to 1.4)   | 820                | 1.9  | (1.7 to 2.0)   |
| <b>Multiparous no previous caesarean section with a trial of labour</b>   | 55 426             |      |                | 25 385             |      |                | 57 330             |      |                |
| Complicated birth                                                         | 2 939              | 5.3  | (5.1 to 5.5)   | 1 676              | 6.6  | (6.3 to 6.9)   | 6 737              | 11.8 | (11.5 to 12.0) |
| Emergency caesarean birth                                                 | 976                | 1.8  | (1.6 to 1.9)   | 749                | 3.0  | (2.7 to 3.2)   | 3 589              | 6.3  | (6.1 to 6.5)   |
| Obstetric anal sphincter injury                                           | 1 125              | 2.0  | (1.9 to 2.1)   | 485                | 1.9  | (1.7 to 2.1)   | 1 541              | 2.7  | (2.6 to 2.8)   |
| Postpartum haemorrhage                                                    | 689                | 1.2  | (1.1 to 1.3)   | 414                | 1.6  | (1.5 to 1.7)   | 1 515              | 2.6  | (2.5 to 2.8)   |
| 5-minute Apgar $\leq 7$                                                   | 318                | 0.6  | (0.5 to 0.6)   | 185                | 0.7  | (0.6 to 0.8)   | 645                | 1.1  | (1.0 to 1.2)   |
| <b>Multiparous with previous caesarean section with a trial of labour</b> |                    |      |                |                    |      |                | 19 694             |      |                |
| Complicated birth                                                         |                    |      |                |                    |      |                | 7995               | 40.6 | (40.0 to 41.3) |
| Emergency caesarean birth                                                 |                    |      |                |                    |      |                | 6 748              | 34.3 | (33.6 to 34.9) |
| Obstetric anal sphincter injury                                           |                    |      |                |                    |      |                | 747                | 3.8  | (3.5 to 4.1)   |
| Postpartum haemorrhage                                                    |                    |      |                |                    |      |                | 1 322              | 6.7  | (6.4 to 7.1)   |
| 5-minute Apgar $\leq 7$                                                   |                    |      |                |                    |      |                | 575                | 2.9  | (2.7 to 3.2)   |

**Supplementary material Table S5: Characteristics of included and excluded NHS hospital trusts, and women who gave birth to a singleton infant at term within those trusts**

|                                                                                                                                                                           | <b>Included<br/>Number (%)</b> | <b>Not included<br/>Number (%)</b> | <b>p value<sup>†</sup></b> |
|---------------------------------------------------------------------------------------------------------------------------------------------------------------------------|--------------------------------|------------------------------------|----------------------------|
| <b>Trust size (births per annum)</b>                                                                                                                                      | <b>87 NHS hospital trusts</b>  | <b>37 NHS hospital trusts</b>      |                            |
| <2500 births                                                                                                                                                              | 13                             | 4                                  | 0.70                       |
| 2500-3999 births                                                                                                                                                          | 18                             | 11                                 |                            |
| 4000-5999 births                                                                                                                                                          | 35                             | 13                                 |                            |
| 6000+                                                                                                                                                                     | 21                             | 9                                  |                            |
| <b>Region of England</b>                                                                                                                                                  |                                |                                    | 0.68                       |
| London                                                                                                                                                                    | 11                             | 5                                  |                            |
| South East/Home Counties                                                                                                                                                  | 17                             | 9                                  |                            |
| East of England                                                                                                                                                           | 2                              | 1                                  |                            |
| Midlands                                                                                                                                                                  | 14                             | 10                                 |                            |
| Northeast and Yorkshire                                                                                                                                                   | 16                             | 5                                  |                            |
| Southwest                                                                                                                                                                 | 12                             | 4                                  |                            |
| North West                                                                                                                                                                | 15                             | 3                                  |                            |
| <b>Age (year)</b>                                                                                                                                                         | <b>322 949 women</b>           | <b>159 792 women</b>               | <0.001                     |
| 15-24                                                                                                                                                                     | 60 693 (18.8%)                 | 30 478 (19.1%)                     |                            |
| 25-34                                                                                                                                                                     | 211 195 (65.4%)                | 95 387 (59.8%)                     |                            |
| 35-44                                                                                                                                                                     | 51 061 (15.8%)                 | 33 729 (21.1%)                     |                            |
| Missing                                                                                                                                                                   | n/a                            | 198                                |                            |
| <b>Ethnicity of women giving birth</b>                                                                                                                                    |                                |                                    | <0.001                     |
| White                                                                                                                                                                     | 233 237 (77.6%)                | 109 312 (76.3%)                    |                            |
| Black                                                                                                                                                                     | 18 421 (6.1%)                  | 9 638 (6.7%)                       |                            |
| Asian                                                                                                                                                                     | 36 643 (12.2%)                 | 18 331 (12.8%)                     |                            |
| Other                                                                                                                                                                     | 12 110 (4.0%)                  | 6 008 (4.2%)                       |                            |
| Unknown                                                                                                                                                                   | 22 538                         | 1650                               |                            |
| <b>Index of multiple deprivation</b>                                                                                                                                      |                                |                                    | <0.001                     |
| 1 (least deprived)                                                                                                                                                        | 53 096 (17.6%)                 | 24 958 (16.7%)                     |                            |
| 2                                                                                                                                                                         | 43 100 (14.3%)                 | 20 390 (13.6%)                     |                            |
| 3                                                                                                                                                                         | 57 691 (19.1%)                 | 26 594 (17.8%)                     |                            |
| 4                                                                                                                                                                         | 67 073 (22.2%)                 | 33 941 (22.7%)                     |                            |
| 5 (most deprived)                                                                                                                                                         | 80 998 (26.8%)                 | 43 625 (29.2%)                     |                            |
| Missing                                                                                                                                                                   | 20 991                         | 10 284                             |                            |
| <sup>†</sup> using chi2 tests to compare proportions<br>*For this comparison, we have restricted to singleton term live births in women aged 15-45 within excluded trusts |                                |                                    |                            |
